# 1 **Climatic suitability predictions for the cultivation of macadamia in Malawi** 2 **using climate change scenarios.**

3 Emmanuel Junior Zuza<sup>1\*</sup>, Yoseph Negusse Araya<sup>1</sup>, Kadmiel Maseyk<sup>1</sup>, Shonil A Bhagwat<sup>2</sup>, Kauê de  
4 Sousa<sup>3,4</sup>, <sup>5</sup>Andrew Emmott, <sup>5</sup>Will Rawes.

5 <sup>1</sup>School of Environment, Earth and Ecosystem Sciences, Faculty of Science, Technology, Engineering &  
6 Mathematics, The Open University, Gass Building, Walton Hall, Milton Keynes MK7 6AA, The United  
7 Kingdom, <sup>2</sup>School of Social Sciences and Global Studies, Faculty of Arts & Social Sciences, The Open  
8 University, Gardiner Building, Walton Hall, Milton Keynes MK7 6AA, The United Kingdom, <sup>3</sup>Department  
9 of Agricultural Sciences, Faculty of Applied Ecology, Agricultural Sciences and Biotechnology Inland  
10 Norway University of Applied Sciences, 2318 Hamar, Norway, <sup>4</sup>Digital Inclusion Area, Biodiversity  
11 International, 00054 Maccarese, Italy, <sup>5</sup>The Neno Macadamia Trust, 42 Harpur Street, Bedford MK40 2QT,  
12 The United Kingdom.

13 \*Emmanuel.Zuza@open.ac.uk.

## 14 **Abstract.**

15 Global climate change is altering the suitable areas of crop species worldwide, with cascading effects on  
16 people and animals reliant upon those crop species as food sources. Macadamia is one of these essential  
17 lucrative crop species that grows in Malawi. Here, we used an ensemble model approach to determine the  
18 current distribution of macadamia production areas across Malawi in relation to climate. For future  
19 distribution of suitable areas, we used the climate outputs of 17 general circulation models based on two  
20 climate change scenarios (RCP 4.5 and RCP 8.5). The precipitation of the driest month and isothermality  
21 were the climatic variables that strongly influenced macadamia's suitability in Malawi. We found that these  
22 climatic requirements were fulfilled across many areas in Malawi under the current conditions. Future  
23 projections indicated that vast parts of Malawi's macadamia growing regions will remain suitable for

24 macadamia, amounting to 36,910 km<sup>2</sup> (39.1%) and 33,511 km<sup>2</sup> (35.5%) of land based on RCP 4.5 and RCP  
25 8.5, respectively. Alarming, suitable areas for macadamia production are predicted to shrink by -18%  
26 (17,015 km<sup>2</sup>) and -21.6% (20,414 km<sup>2</sup>) based on RCP 4.5 and RCP 8.5, respectively, with much of the  
27 suitability shifting northwards. This means that some currently productive areas will become unproductive  
28 in the future, while current unproductive areas will become productive. Notably, suitable areas will increase  
29 in Malawi's central and northern highlands, while the southern region will lose most of its suitable areas.  
30 Our study, therefore, shows that there is potential for expanding macadamia production in Malawi. Most,  
31 importantly our future projections provide critical evidence on the potential negative impacts of climate  
32 change on the suitability of macadamia production in the country. We recommend developing area-specific  
33 adaptation strategies to build resilience in the macadamia sector in Malawi under climate change.

34 **Keywords:** Malawi, macadamia, climate change, ensemble model.

### 35 **1. Introduction.**

36 Global climate change has become an indisputable fact and has altered ecosystems, including human health,  
37 livelihoods, food security, water supply, and economic growth [1]. These impacts are predicted to increase  
38 sharply with the degree of warming. For example, warming to 2 °C is expected to increase the number of  
39 people exposed to climate-related risks and poverty by up to several hundred million by the 2050s [1]. This  
40 represents significant threats to current agricultural production systems in many parts of Africa, especially  
41 among smallholder farming families with little adaptive capacity [2], [3]. Sub-Saharan Africa (SSA) is one  
42 of the most vulnerable regions to climate change due to the combination of the reduction in precipitation  
43 with the increase in temperature [4]–[6]. Within SSA, Malawi has been highlighted as being particularly  
44 vulnerable to climate change due to high levels of poverty, limited finances and technology, and heavy  
45 reliance on a predominantly rain-fed agricultural sector for its food and nutritional security, economy, and  
46 employment [7], [8].

47 Climate change is already hampering agricultural production in Malawi. Since the 1960s temperatures  
48 have increased in all seasons and throughout the country by approximately 0.9 °C [6]. Projected temperature

49 data indicates warming throughout Malawi, from 0.5–1.5 °C by the 2050s. This increase in warming is  
50 expected to increase transpiration and evaporation from plants, soil, and water surfaces [9]. Moreover,  
51 under all future climate projections (2050–2100), Malawi's surface temperatures are expected to rise [10].  
52 In terms of precipitation, [6] observed variability in projected amounts and seasonal patterns. Analysis of  
53 34 climate change models projecting up to the 2090s suggests more frequent dry spells and increases in  
54 rainfall intensity [11]. These changes are likely to threaten livelihoods, increase the risk of food insecurity,  
55 and negatively affect Malawi's economic growth.

56 Increased warming and unreliable rainfall within Malawi will impact the landscape and the livelihoods of  
57 many rural populations who depend on agricultural activities [10], [12]. Barrueto et al. observed that in  
58 Nepal's highlands, increased temperatures led to changes in cropping systems because of an upward shift in  
59 perennial tree crops' suitability [13]. Like Nepal, climate change will cause shifts in agricultural systems in  
60 Malawi. With the country's high deforestation rates, increases in diurnal temperature changes are expected,  
61 which will make it more difficult for crop growth and development [14]. Consequently a proper assessment  
62 of climate suitability for various crops under current and future climatic conditions is essential in governing  
63 agricultural land use planning in Malawi [12], [15].

64 Climate suitability reflects the degree of agreement of climate resources required for crop growth and is  
65 used to evaluate the relationship between crop distribution and climate factors. Climate suitability, however,  
66 only considers climate conditions and does not test socio-economic factors, management practices, and soil  
67 types [16]. The process involves applying a crop model to simulate the interaction between different climate  
68 factors, explore the potential impact of climate change on agricultural production, and determine production  
69 potential for a particular crop and area [17]. Climate suitability assessment should be the first step in  
70 agricultural land use planning as it identifies limiting factors for growing a particular crop in an area and  
71 aids in decision-making for sustainable agricultural systems [18]. For perennial crops such as coffee and  
72 macadamia, climate suitability assessment is essential because they are long-term investments with high  
73 initial costs to establish the crops [19]. Proper planning is, therefore, key to the success of perennial tree

74 production. However, in Malawi climate suitability studies have primarily focused on important cash and  
75 staple crops [20]. Cash crops are cultivated mainly to be sold rather than used by the people who grew them  
76 [12]. Important cash crops in Malawi include tea [21], cashew, coffee, cotton, pulses, sugarcane, tobacco  
77 [12]), and macadamia [20]. Cash crops such as macadamia and pulses contribute to food security and  
78 economic development, particularly among the producers as they are used for income generation. Staple  
79 crops are consumed routinely and in large quantities and constitute a dominant portion of the standard diet.  
80 In Malawi, the most important staple crop is maize [20].

81 Agriculture forms the backbone of the economy and society of Malawi [22]. Nearly 85% of the country's  
82 households are dependent on agricultural activities for their livelihoods [23]. The agricultural sector consists  
83 of two distinct sub-sectors: smallholder farmers and commercial estates sub-sectors. About 11% of the rural  
84 labor force works on commercial estates to supplement farm income, and around 80% is engaged in the  
85 smallholder sub-sector [24]. Smallholder production accounts for 90% of all the country's food [25].  
86 Despite the smallholder sub-sector contributions to Malawi's food security, individually, most smallholders  
87 are food insecure annually [26]. This is due to their dependency on rainfed agriculture, limited usage of  
88 modern tools for farming, and unpredictable weather patterns [26], [27]. Moreover, food security among  
89 these smallholder farmers is not permanent, as the fall from food abundance to food scarcity can occur  
90 within a matter of days when one's income is lost to bad weather [28], [29]. Meeting Malawi's growing  
91 demand for food in the coming decades is likely to become more difficult as already stressed agricultural  
92 systems will be challenged by population growth (expected to peak at 38.1 million by 2050) and rising  
93 incomes, especially among rural communities. Thus, effective agricultural adaptation to the changing  
94 climate conditions requires a good understanding of how climate change may affect cultivation patterns and  
95 various crops' suitability.

96 Studies on the projected effects of climate change in Malawi have mainly focused on staple and cash crops,  
97 specifically maize and tobacco. Little is known about perennial tree crops, which are essential to addressing  
98 the country's future food security uncertainty [30], [31]. However, a good understanding of how climate

99 change may affect cultivation patterns and crops' suitability is an effective agricultural adaptation strategy  
100 for survival. This is because adverse effects of climate change in the future may drive smallholder farmers  
101 and rural populations, in general, to migrate due to a reduction in productivity and changes in land-use  
102 zones. To mitigate the projected impacts of climate change on land and crop use planning, Benson et al.  
103 examined the climate suitability of a wide range of important crops grown in Malawi [12]. But, this study  
104 did not evaluate the suitability of macadamia in Malawi despite its increasing importance as a commercial  
105 cash crop and its benefits for food and nutrition security.

106 Macadamia (*Macadamia integrifolia* Maiden & Betche) is an evergreen perennial crop and belongs to the  
107 Proteaceae family [32]. Its kernel contains more than 72% oil content and is one of the most highly regarded  
108 nuts globally. This is due to its high nutritional value and high market price driven by consumers' high  
109 demand for the nuts and products [32]. Macadamia trees were historically inter-cropped with coffee, tea,  
110 and tung oil in commercial estates in southern Malawi [33]. Currently, over one million macadamia trees  
111 have been planted under the commercial estate sub-sector and over 300,000 trees under the smallholder sub-  
112 sector, which is expected to increase to over 1,000,000 in the next decade [20]. Globally, Malawi is the  
113 seventh-largest producer of macadamia nuts [20]. According to [20], [33], Malawi could become the biggest  
114 producer of macadamia in the world. This potential is attributed to the country having the most suitable  
115 altitude and climatic conditions for its growth and development and large land pockets among smallholders  
116 that offer expansion opportunities.

117 Macadamia is a lucrative crop among smallholder producers in Malawi for food security and income  
118 generation [34]. However, climate change is expected to negatively affect productivity and land suitability  
119 for macadamia production in the future in most producing countries. This is because macadamia is sensitive  
120 to variations of climatic factors, especially cannot resist higher temperatures and droughts [35]. Macadamia  
121 is best suited in areas with annual mean temperatures ( $T_{\text{mean}}$ ) ranging from 10–15 °C [36]. The optimal  
122 temperature for macadamia growth and development is between 16–30 °C [36]. Nevertheless, lower day  
123 temperatures ( $\leq 10$  °C) are lethal to the crop. Nagao and Ho found that higher temperatures exceeding 30

124 °C are associated with water loss that subsequently restricts the build-up of oil in the nuts and reduces their  
125 quality [37]. For precipitation, various authors have suggested a tolerable annual rainfall ranging from 510  
126 to 4000 mm [35–38]. Britz reported that macadamia yield in South Africa was lost due to spatiotemporal  
127 variability in precipitation and temperature [39]. A detailed summary regarding climatic conditions for  
128 macadamia production is given in Supplementary Table S1.

129 A scientific description of climate suitability of crop distribution is of great significance to mitigate the  
130 negative effects of climate change and ensure food security. Therefore, this research aims to assess the  
131 suitability of macadamia in Malawi's current and future climate and predict suitable geographic regions for  
132 its production. First, we assess the current spatial distribution of macadamia in Malawi. Then we model  
133 the future distribution of macadamia utilizing bioclimatic variables [40], obtained from downscaled Coupled  
134 Model Intercomparison Project 5 (CMIP5) GCMs [41], based on two emission scenarios (RCP) of climate  
135 change [42]. We focus on climate projections for the 2050s to align with the United Nations framework of  
136 global challenges in agriculture and food security [43].

## 137 **2. Methods.**

### 138 **2.1. Study area.**

139 Malawi falls within the longitudes 30 and 40, and the latitudes –17 and –10 (Supplementary Fig S1). The  
140 country spans over 118, 484 km<sup>2</sup>, with 94, 449 km<sup>2</sup> (80%) of land area and 24, 035 km<sup>2</sup> (20%) of water  
141 surfaces. Soil nutrient status varies tremendously across the country due to the variability in topography  
142 (Fig 1), parent materials, and management, especially among smallholder farmers [15]. Due to this reason,  
143 soil characteristics were not considered for our analysis.

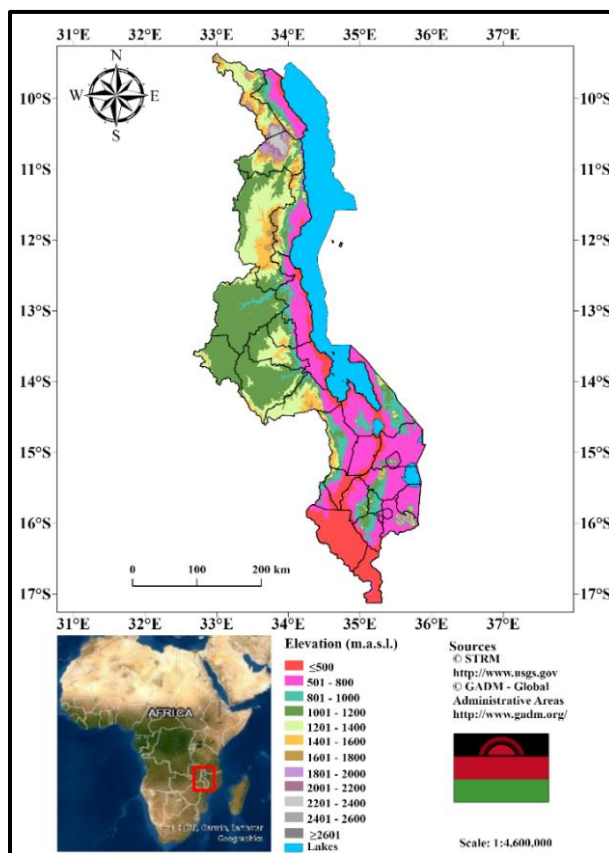

144  
145 Fig 1: Geographic location and topography of Malawi based on Shuttle Radar Topography Mission digital  
146 elevation model data.

147 Malawi has a sub-tropical climate with two distinct seasons, the rainy season from November to April that  
148 delivers 90–95% of the annual precipitation [44], and the pronounced dry season from May to October. The  
149 geographical distribution of temperature and precipitation in Malawi is primarily determined by topography  
150 and the distance to the Indian Ocean and Lake Malawi. Further, large elevation changes in escarpment areas  
151 make the climate in the uplands and lowlands significantly different [44]. Lower maximum temperatures  
152 and higher precipitations are experienced in different escarpment areas in Malawi. For example, the northern  
153 parts of Malomo in Ntchisi district lies in the rain shadow area, while the southern part receives higher  
154 rainfalls and cooler temperatures. The average precipitation varies from 500 mm in low-lying marginal  
155 areas ( $\leq 500$  meters above sea level/ m.a.s.l.) to over 3000 mm in high plateau areas [12]. The mean annual  
156 minimum and maximum temperatures for Malawi are 12 and 32 °C, respectively, with the lowest

157 temperatures in June and July and the highest in October or early November [45]. Fig 2 illustrates the spatial  
158 pattern of average annual temperatures (a) and annual precipitation (b).

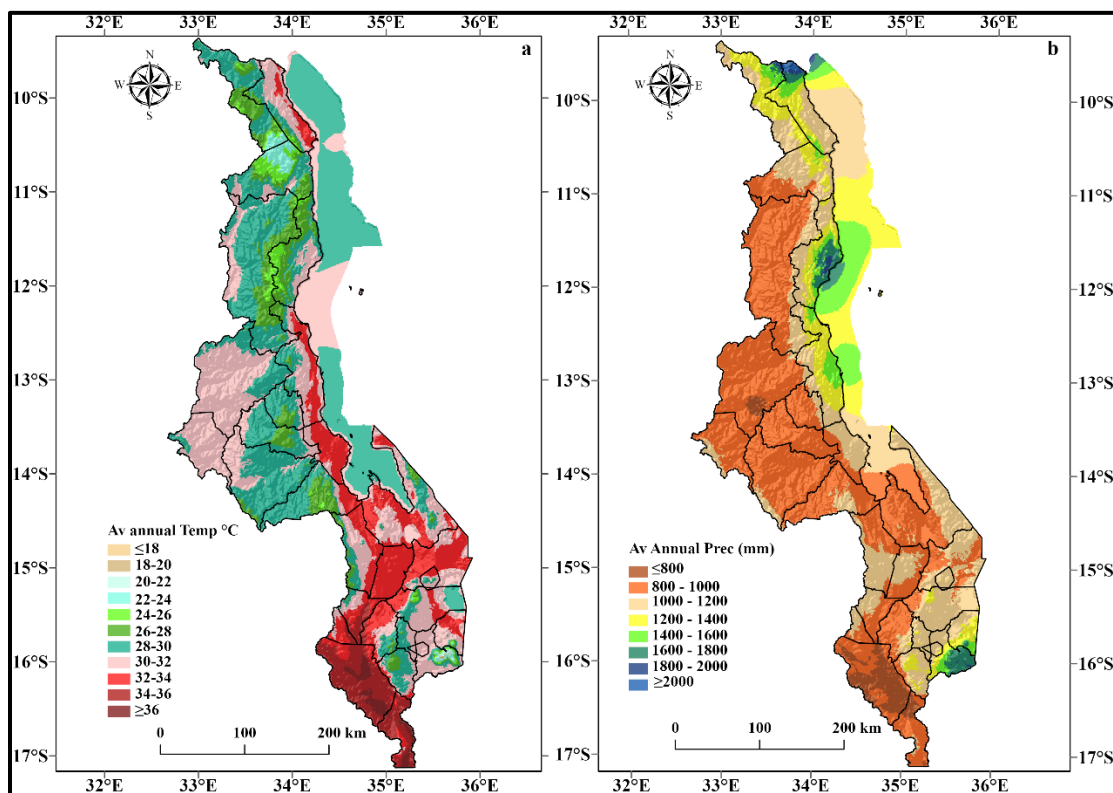

159  
160 Fig 2: a). Average annual temperature (°C) and b). Precipitation (mm) of Malawi based on WorldClim-  
161 Global Climate Data.

## 162 2.2. Occurrence data.

163 Data on macadamia tree species' occurrence was collected from smallholder macadamia producing districts  
164 in 2019 through a field survey of macadamia farms in Malawi. For our analysis, we only sampled ten-year-  
165 old successfully established macadamia orchards under smallholder rainfed conditions. At each farm, the  
166 Global Position System (GPS) coordinates (in WGS84 datum) were collected using a global position system  
167 (Garmin eTrex Vista® Cx) together with altitude. A total of 120 orchards were sampled throughout Malawi,  
168 but for this study, a total of 36 points were used for the modelling purpose (Fig 3). The remaining 84  
169 occurrence points were used for cross-validation to evaluate the predictive model accuracy [46]–[49].



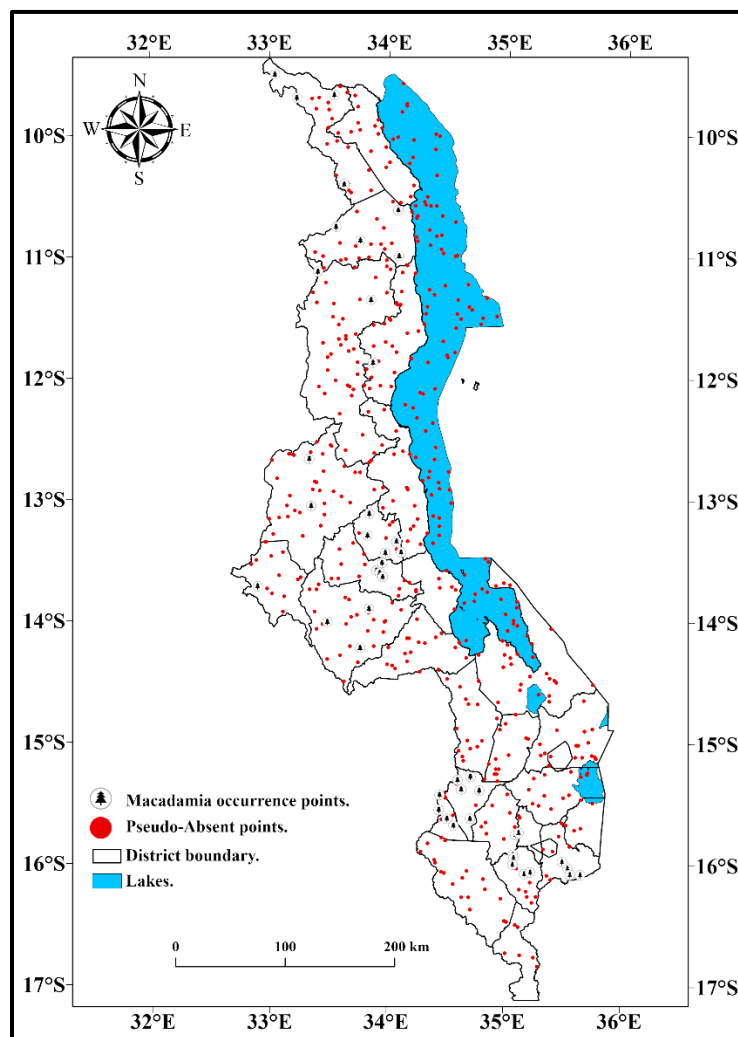

170

171 Fig 3: Map of Malawi showing macadamia occurrence points and pseudo absent points.

### 172 2.3. Climate data.

173 We used bioclimatic predictors (~1970–2000) from WorldClim data set version 1.4 ([http://](http://www.worldclim.org/)  
174 [www.worldclim.org/](http://www.worldclim.org/)) at a spatial resolution of 2.5 arc-minute (4.5 km<sup>2</sup> at the equator) to model the current  
175 areas suitable for macadamia production in Malawi. Calculated from monthly temperature and precipitation  
176 climatologies, these variables reflect spatial variations in annual means, seasonality, and extreme/limiting  
177 conditions (Supplementary Table S2). We used bioclimatic variables from 17 general circulation models  
178 (GCMs) based on two representative concentration pathways (RCP) of climate change [42] for future  
179 predictions. We selected RCP 4.5, which is an optimistic scenario that considers an intermediate GHG

180 concentration and predicts an average increase in temperature by 1.4 °C (0.9–2.0 °C) and RCP 8.5 the most  
181 pessimistic scenario, which considers higher GHG emissions concentration with a 1.4–2.6 °C projected  
182 increase in mean global temperature by the 2050s (period 2046–2065). The bioclimatic variables from  
183 WorldClim that we used include limiting factors that are ecologically important based on temperature and  
184 precipitation variation. To avoid model overfitting, we selected the least correlated variables by applying  
185 the variance inflation factors (VIF) and retained those with  $VIF < 10$  [50]. Variables with the highest  
186 correlation ( $VIF \geq 10$ ) were removed, resulting in eight bioclimatic predictors for our analysis (**Error!**  
187 **Reference source not found.**). The long-term ecological conditions are essential for predicting perennial  
188 crop production [51] because perennial crops are in the field for more than 25 years, and productivity is  
189 measured by yield quantity and quality.

#### 190 **2.4. Modelling approach.**

191 We modelled the current and future distribution of macadamia species in Malawi based on an ensemble  
192 suitability method implemented by the R package BiodiversityR. We used an ensemble modelling technique  
193 because it combines predictions from different algorithms and can provide better accuracy in predictions  
194 than relying on individual species distribution models [52]. The procedure consisted of four steps.

195 Firstly, we evaluated the predictive performance accuracy of 18 algorithms of species distributions models  
196 (SDM) using a fivefold cross-validation technique. Following work by [53] and [54], we divided the  
197 occurrence data into two different sets by randomly assigning 70% of the data as a training dataset to fit the  
198 model, and the remaining 30% were used as test data to evaluate the model prediction accuracy. To test the  
199 stability of the prediction accuracy, a five-fold (bins) cross-validation replicate was performed in the model  
200 as described by [47]. Each SDM algorithm's performance was evaluated from each bin separately after  
201 individual algorithms were assessed with data from the other four bins. The algorithms' performance was  
202 measured with the area under the curve (AUC). The AUC value provides a specific measure of model  
203 performance, demonstrating the model's ability to locate a randomly selected present observation in a cell  
204 of higher probability than a randomly chosen absence observation [52], [55]. We used an AUC value of

205 0.77 as a threshold to select the best-performing algorithms for our analysis. Species distribution model  
206 algorithms that did not fit this criterion were not used to calculate the ensemble model's suitability [56].

207 Additionally, we only used SDM algorithms that can distinguish between suitable and non-suitable areas  
208 without needing absence locations [57]. The presence-only approach was utilized because, for agricultural  
209 applications of niche models, it is inappropriate to treat areas without current production as entirely  
210 unsuitable. Further, it is difficult and rare to determine whether a species is absent in a particular location.  
211 Hence, absence data may not represent naturally occurring phenomena [51]. According to [58], presence-  
212 only models can produce reliable predictions from limited presence datasets, meaning that they are robust  
213 and a cheaper option for obtaining training datasets. To enhance our ensemble model's predictive ability,  
214 the macadamia occurrence data was coupled with 500 randomly pseudo-absence data generated throughout  
215 Malawi (Fig 3). We used the pseudo-absence data as opposed to using real absences to avoid  
216 underestimation issues [59].

217 In the second step, we retained only the algorithms that contributed at least 5% to the ensemble suitability  
218 ( $Se$ ) [50]. This generated AUC values for each algorithm and the parameters of the response functions that  
219 estimated the probability values of species occurrence based on the climate of each grid cell of the study  
220 area (Supplementary Table S5). AUC values ranged between 0 and 1, and a value less than 0.5 indicated  
221 that the simulated result was worse than random [60]. Classification of model performance estimated by  
222 the AUC was: 0.50–0.60 fail; 0.60–0.70 poor; 0.70–0.80 fair; 0.80–0.90 good; 0.90–1.0 excellent, and  
223 further the AUC value higher than 0.77 [61]. We later combined the results of all the models by calculating  
224 for each model the weighted average (weighted by AUC for each model) of each model's probability values  
225 to generate the ensemble suitability map. We weighted the AUC values using the following equation:

$$226 \quad Ensemble (S_e) = \frac{\sum_i w_i S_i}{\sum_i w_i} \quad (1)$$

227 Where the ensemble suitability ( $Se$ ) is obtained as a weighted ( $w$ ) average of suitabilities predicted by the  
228 contributing algorithm ( $S_i$ ).

229 The third step generated the current distribution maps (probability maps and presence-absence maps) of  
230 macadamia under the current climate. This was based on the weights which were generated during model  
231 calibration. To generate the absence-presence layers, we used the maximum sensitivity (true positive<sup>+</sup>) and  
232 maximum specificity (true negative<sup>-</sup>) approach [62], where we reclassified the distribution maps to binary  
233 maps (suitable and unsuitable areas). In [48], [59], [63], it was shown that this method is one of the most  
234 reliable for choosing a reclassification method. In this analysis, sensitivity is the proportion of observed  
235 presences correctly predicted and therefore is a measure of omission errors, whereas specificity represents  
236 the proportion of correctly predicted absences and thus quantifies commission errors.

237 To create distribution maps for future bioclimatic conditions, we utilized the same procedure used in the  
238 baseline suitability and presence-absence maps but utilized the climate information from each of the 17  
239 future GCM for RCP 4.5 and RCP 8.5. Since no criteria exist to assess which of the GCMs best predict  
240 future climate [64], by incorporating all 17 GCMs, we encompassed all possible changes in the distribution  
241 of the macadamia species. To integrate the results of the 17 GCMs presence-absence layers into a single  
242 layer, we used the criterion of likelihood scale [48], which requires at least 66% of agreement among GCMs  
243 to keep the predicted presence or absence in a given grid cell.

### 244 **3. Results.**

#### 245 **3.1. Factors determining land suitability of macadamia in Malawi.**

246 Our study has shown that precipitation-related variables were the most important in determining the  
247 distribution and suitability of macadamia in Malawi. Precipitation of the driest month (9.69) was the  
248 variable with the greatest relative influence on macadamia production. Possibly because of the sensitivity  
249 of pod growth during this phase to water scarcity. Among the temperature variables, isothermality (this  
250 variable is calculated by dividing mean diurnal temperature range by mean annual temperature range) was  
251 the most significant, with a VIF score of 8.95 (

252 Table 1). Based on our ensemble model, annual means did not influence macadamia suitability in Malawi.

253 Table 1: Climate variables influencing macadamia suitability in Malawi.

| Covariate | Bioclimatic variable                     | Unit | VIF Score |
|-----------|------------------------------------------|------|-----------|
| Bio14     | Precipitation of driest month            | mm   | 9.69      |
| Bio3      | Isothermality (BIO2/BIO7) x 100          | -    | 8.95      |
| Bio15     | Precipitation seasonality (cv x 100)     |      | 8.09      |
| Bio2      | Mean diurnal range (Mean of monthly)     | °C   | 8.05      |
| Bio18     | Precipitation of warmest quarter         | mm   | 7.01      |
| Bio13     | Precipitation of wettest month           | mm   | 6.73      |
| Bio6      | Minimum temperature of the coldest month | °C   | 5.87      |
| Bio4      | Temperature seasonality (Std. Dev x 100) | -    | 4.12      |

### 254 3.2. Current suitability of macadamia in Malawi.

255 Results of the present (~1970–2000) suitability analysis showed that 53,925 km<sup>2</sup> (57.4%) of the surface area  
256 in Malawi is suitable for macadamia production (Fig 4), while 40,524 km<sup>2</sup> (42.6%) is unsuitable for the  
257 crop. Therefore, our findings demonstrate that currently, macadamia is grown in a broad range of  
258 environments (Fig 4); the variations in the color gradient represent the degree of macadamia suitability per  
259 grid cell. Suitability values range from 0 and 1, whereas values of  $\geq 0.84$  (forest green) are considered as  
260 highly suitable areas, 0.74–8.4 (jade green) optimal, 0.54–0.74 (mint green) moderate, and  $\leq 0.54$  (yellow)  
261 indicate marginal areas. We observe that macadamia's optimal suitability was across the higher elevated  
262 areas and marginal suitability in the lower elevated areas. Further, suitability peaked in areas around 1000  
263 m.a.s.l., receiving at least 1000–1200 mm of rainfall and temperatures not exceeding 30 °C.

264 Interestingly, our findings showed optimal suitability in some areas where the average annual temperatures  
265 are considered too hot for macadamia ( $\geq 30$  °C), specifically in areas around Katunga (Chikwawa),  
266 Luchenza (Mulanje), and Nsabwe (Thyolo). Highly suitable areas were observed in Malawi's mountainous  
267 regions with elevation ranging from 1200–1600 m.a.s.l. in some parts of Dowa, Chitipa, Machinga Mulanje,  
268 Mzimba, Ntchisi, Nkhatabay, Rumphi, and Thyolo. Areas with moderate suitability were predicted in the  
269 mid-hills between 950–1000 m.a.s.l. in Blantyre, Chiradzulu, Dedza, Kasungu, Lilongwe, Mchinji,  
270 Mwanza, Neno, Ntcheu, and Zomba districts. Marginally suitable areas are found in the lower elevated ( $\leq$

271 900 m.a.s.l) parts of Malawi. Expectedly, our ensemble model for the current distribution of suitable areas  
272 for macadamia production largely overlapped the area of macadamia production in Malawi. Additionally,  
273 these areas are also utilized for the production of other crops, especially annuals.

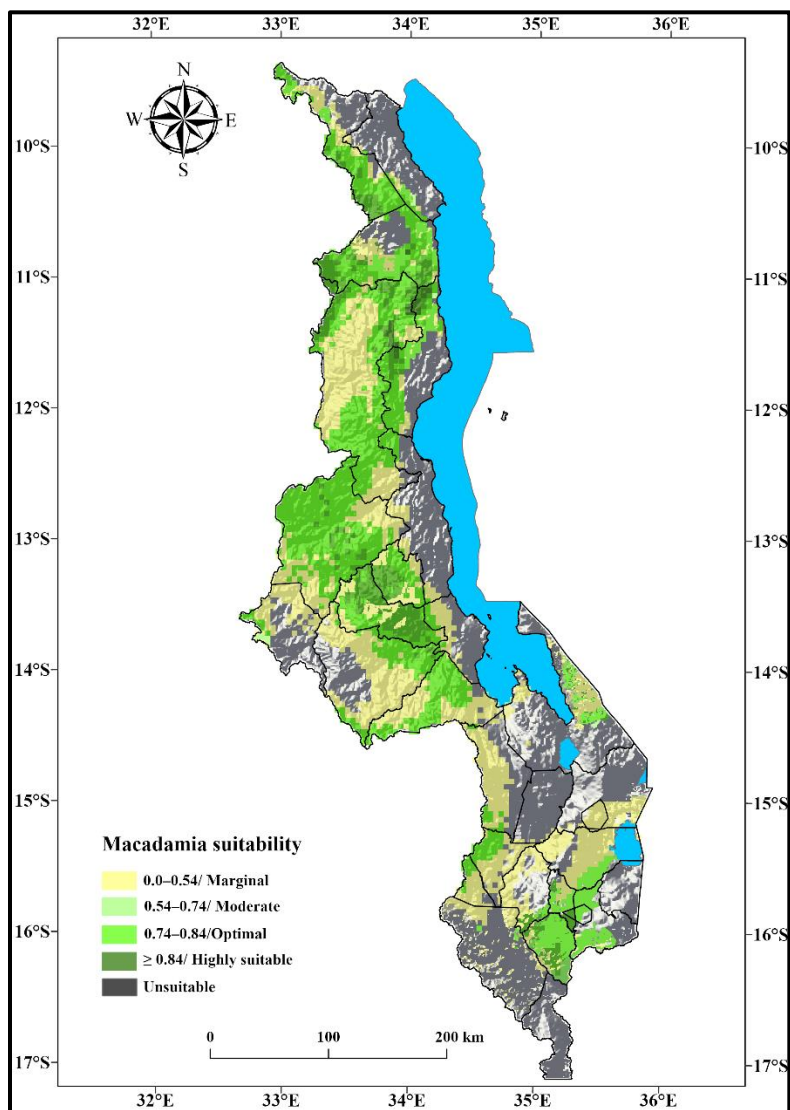

274  
275 Fig 4: Current suitability for macadamia production in Malawi.

### 276 3.3. Gain and loss of suitability under future projections in Malawi.

277 Compared to current climate conditions, the extent of suitable areas for macadamia production is expected  
278 to decrease in the future under both emission scenarios utilized in this analysis. Our results revealed a net  
279 loss of -18% and -21.6% of potentially suitable land for macadamia production under RCP 4.5 and RCP

280 8.5, respectively (Fig 5). This translates to 17,015 km<sup>2</sup> (RCP 4.5) and 20,414 km<sup>2</sup> (RCP 8.5) of Malawi's  
281 total cultivatable surface area. Areas located in lower altitudes (500–1000 m.a.s.l.) will suffer the greatest  
282 decline in suitability due to the projected general temperature increases and reduced precipitation amounts  
283 and distribution. These losses will be more pronounced in Malawi's southern region areas, especially those  
284 along the shire valley. Further, some southern region areas will become marginal or even unsuitable for  
285 macadamia, while others will remain suitable though less than today. Thyolo district, which is currently the  
286 country's most productive and biggest macadamia growing area, is predicted to suffer significant reductions  
287 in suitability areas due to climate change. This is attributed to southern Malawi's low-lying nature and high  
288 risks of heatwaves, flooding, and droughts linked to the El Niño Southern Oscillation.

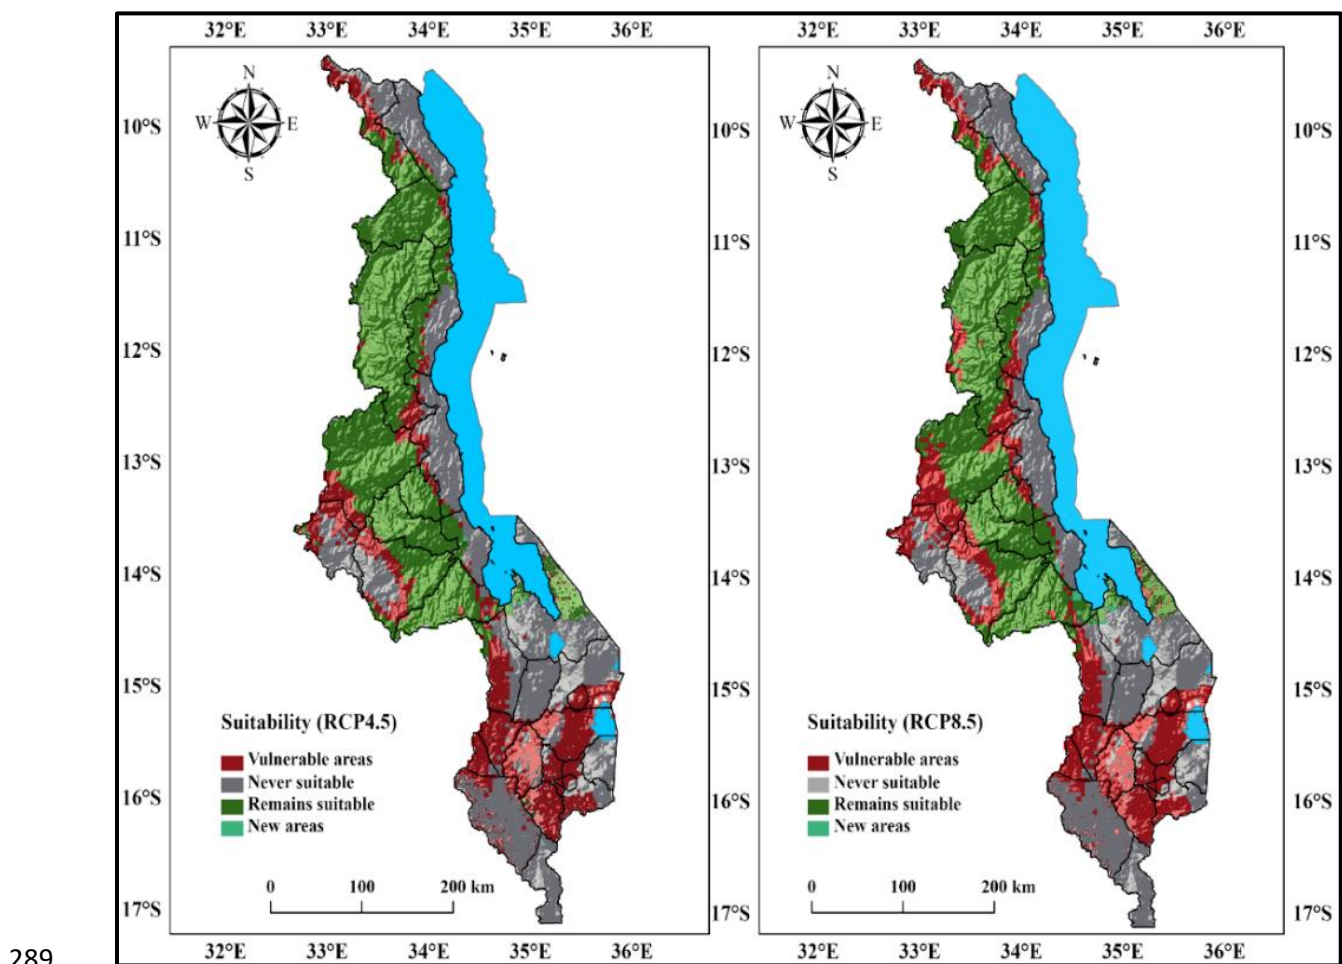

Fig 5: Shifts in macadamia suitability due to climate change by 2050 (a) RCP 4.5 (b) RCP 8.5.

291 Surface gains under future climate projections for macadamia suitability are described in Table 2. Both  
 292 scenarios show that a large fraction of suitable areas for macadamia production will remain unchanged.  
 293 Approximately 36,910 km<sup>2</sup> and 33,511 km<sup>2</sup> of Malawi's surface area are projected to remain unchanged  
 294 under RCP 4.5 and RCP 8.5, respectively. The intermediate optimistic scenario (RCP 4.5) indicated an  
 295 average gain (newer areas) of 0.22% of Malawi's surface area, amounting to approximately 207 km<sup>2</sup> of  
 296 potentially suitable land. Under RCP 8.5 scenario, newer areas are projected to account for 0.5% of the  
 297 land, translating to 476 km<sup>2</sup> of Malawi's total surface area. We observed that projected newer areas will be  
 298 more under RCP 8.5, amounting to 0.28% more than RCP 4.5. The reason being that some of the very cold  
 299 areas currently unsuitable for macadamia will become suitable due to the projected increased warming by  
 300 the scenario RCP 8.5. The newer areas are predicted to occur in Dedza (Mua and Chipansi), Mangochi  
 301 (Namwera and Chaponda), and Ntcheu (Tsangano and Bonga) districts based on both emission scenarios.  
 302 Nevertheless, these apply only to very limited areas in the country and cannot compensate for the suitability  
 303 decrease in the lowlands. Our analysis, therefore, shows that the results for the RCP 4.5 and RCP 8.5 models  
 304 are similar in direction, but the RCP 8.5 models project a greater reduction in suitable areas in warmer  
 305 locations and expansion of suitable areas in colder locations by the 2050s.

306 Table 2: Future distribution area of macadamia production in Malawi by 2050.

| RCP | Category           | Area (km <sup>2</sup> ) | % changes <sup>a</sup> | Net change (%) <sup>b</sup> |
|-----|--------------------|-------------------------|------------------------|-----------------------------|
| 4.5 | No longer suitable | 17,015                  | -18.0                  |                             |
|     | Never suitable     | 40,317                  | 42.7                   |                             |
|     | Remains suitable   | 36,910                  | 39.1                   | -17.8                       |
|     | New Areas          | 207                     | 0.22                   |                             |
| 8.5 | No longer suitable | 20,414                  | -21.6                  |                             |
|     | Never suitable     | 40,047                  | 42.4                   |                             |
|     | Remains suitable   | 33,511                  | 35.5                   | -21.1                       |
|     | New Areas          | 476                     | 0.5                    |                             |

307 <sup>a</sup> Percentage of the total land area of Malawi (94,449 km<sup>2</sup>).

308 <sup>b</sup> Net change is the balance between colonization and loss (positive net balance indicates an increase in the areas suitable  
 309 for the species, and negative net balance indicates a decrease in the areas suitable for the species).

310 Our results suggest a northward shift in the location of the most suitable areas for macadamia production, a  
 311 reduction of highly suitable areas in the south, and an increase along the central and northern parts of



312 Malawi, dependent on the landscape topography (Fig 6). Areas projected to lose their suitability occur  
313 mainly in Malawi's southern regions, including Blantyre, Chikwawa, Chiradzulu, Machinga, Mwanza,  
314 Mulanje, Thyolo, and Zomba districts. The projected loss is approximately 95–100% of the currently  
315 suitable areas in southern Malawi. This is attributed to the projected increases in temperature and frequency  
316 of droughts in the areas. Nevertheless, some higher elevated areas ( $\geq 1600$  m.a.s.l.) within Chitipa (Misuku  
317 hills), Ntchisi (Malomo and Kalira), and Rumphi (Mphompha and Ntchenachena) districts will similarly  
318 lose some of their suitable areas for macadamia production.

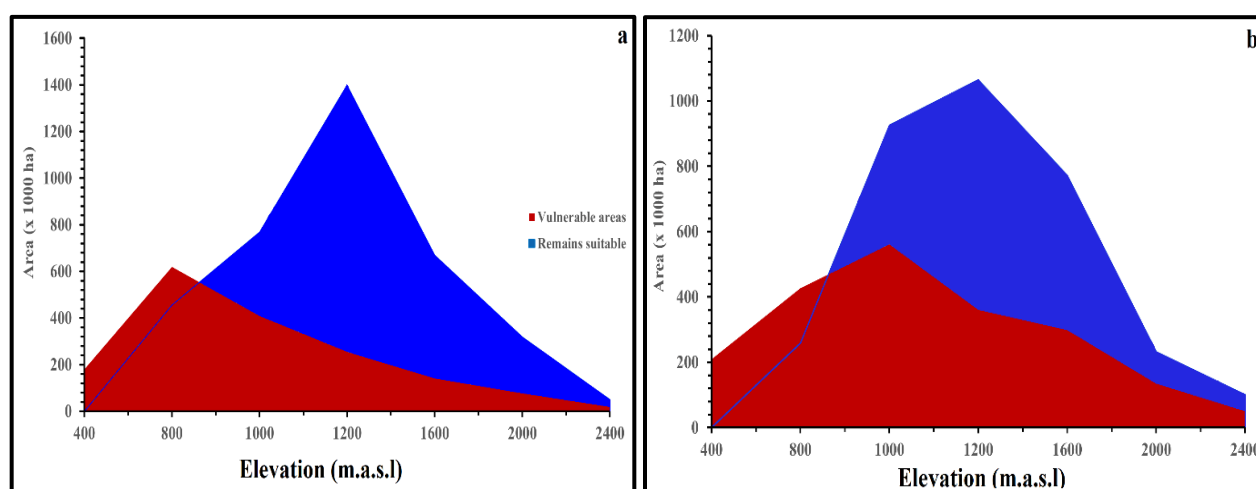

319 Fig 6: Shifts in macadamia suitability by 2050 in Malawi shown by the altitudinal gradient (a) RCP 4.5 (b)  
320 RCP 8.5.

#### 321 4. Discussion.

322 Precipitation and temperature have been identified as critical factors influencing crop growth and yields  
323 across the globe. Our results revealed that macadamia suitability in Malawi is influenced by the interactions  
324 of temperature and precipitation and seasonal variations of the two than the annual means. The climate  
325 variables at a national scale determined in this study might be different from climate indicators at the  
326 regional and global scale. A previous researcher showed that the annual mean temperature, the warmest  
327 month's maximum temperature, minimum temperature of the coldest month, and annual precipitation were  
328 viewed as climatic regionalization indices for macadamia in Nepal. In the present study, we observe that  
329 precipitation-based factors are more valuable in determining the suitability of macadamia in Malawi,

330 verifying zoning studies for macadamia production done for the country [38]. In these studies, precipitation  
331 distribution and quantity were identified as the most critical variables, and it is apparent when considering  
332 the current macadamia belt that water supply is the most limiting factor for the crop. Consequently,  
333 projections that climate change will reduce rainfall amounts making its distribution unreliable in many parts  
334 of Malawi, especially the southern region [9], will drive many areas out of macadamia production.

335 The distribution of precipitation is more related to precipitation of the warmest quarter and precipitation  
336 seasonality. In this regard, areas with sufficient and sustainable water supply during the drier months of the  
337 season (May–November) will remain suitable for macadamia. However, the regions with low annual  
338 precipitation and soils with poor water holding will lose their macadamia production suitability. Our  
339 findings concur with early studies by [65], who found that water deficits from prolonged drought periods  
340 induced macadamia flower losses and tree mortality, leading to lower yields in Australia. An interview with  
341 one of the macadamia farmers in Malomo in Ntchisi district identified the link between water scarcity and  
342 macadamia suitability. Joseph Makono explained in the interview:

343 *"During the flowering period which coincides with the dry season, I have observed that most of the*  
344 *macadamia flowers drop from the trees because of the low moisture content in the soil around the*  
345 *plant."*

346 To avoid yield losses caused by drought stress, farmers need to adopt moisture conservation measures  
347 (mulching, rainwater harvesting, box ridging, and basins) and possibly develop irrigation infrastructure to  
348 match the water requirements for macadamia growth and development annually. This is especially  
349 important for the areas in southern Malawi that are prone to droughts and flooding.

350 Temperature isothermality was found to be the most important factor determining the suitability of  
351 macadamia in Malawi. This index is a measure of temperature heterogeneity and is a composite of two  
352 variables reflecting temporal variation in temperature: diurnal range and annual range. Our findings  
353 indicated that large fluctuations between day and night temperatures and increased warming affect

354 macadamia suitability in Malawi. Marginal suitability of the crop was observed in areas located in the hotter  
355 ( $\geq 30$  °C) and lower elevated parts of Malawi, notably along the lakeshore and Shire valley. This is attributed  
356 to higher daytime and night-time temperatures experienced in these areas. Optimal suitability is observed  
357 in intermediate to upper elevated areas that experience cooler temperatures, especially at night. Thus,  
358 projections that climate change will increase the number of hot days (30.5) and hot nights (40) [11] will  
359 certainly reduce the number of suitable areas for macadamia production in Malawi due to increased  
360 warming, which will result in increased evapotranspiration rates. Taking this into account, trees currently  
361 grown in the hotter areas will require sufficient water availability to cater to the water lost through  
362 evapotranspiration. In Australia, Nepal, and South Africa, studies have shown that high daytime and high  
363 night-time temperatures are responsible for the reduction in yields and suitable production areas for  
364 macadamia [36], [39], [66], therefore agreeing with our current findings in Malawi. Consequently, climate  
365 change will have dual impacts on macadamia production by reducing suitable production areas and reducing  
366 the nut yield and quality.

367 Due to its geographic location and socio-economic status, Malawi is most exposed to climate change [7],  
368 [8]. Thus understanding species' response to climate change is crucial in Malawi for agricultural land use  
369 planning, notably for high-value perennial crops [44], [49], [56]. Our predictions suggested that  
370 extensive areas in Malawi under the current climatic conditions are suitable for macadamia production. At  
371 present, the crop is grown over a wide range of altitudes (500–1400 m.a.s.l.) throughout the country.  
372 Furthermore, our findings suggested the suitability of macadamia in Malawi's south-eastern parts, such as  
373 in Luchenza, Katunga, and Nsabwe, which are beyond the current reported production areas and considered  
374 to be too hot for the crop. This is expected as the suitability maps capture the potential production areas,  
375 some of which have not yet been translated to realized areas [51]. Additionally, this illustrates the broad  
376 adaptability of some macadamia cultivars that allows its production from high potential areas to marginal  
377 and low input areas with several environmental constraints. Nonetheless, these areas are the most vulnerable  
378 to climate change because of limited buffering potential.

379 Malawi is already falling outside the prescribed optimal range for macadamia production, attributing it to  
380 climate change. This is evident by the 0.9 °C increase in annual mean temperature and overall drying  
381 recorded in the past five decades [6], [67], [68]. As a result of the projected temperature increases, changing  
382 rainfall patterns, and increased water scarcity, the suitability for macadamia production in Malawi is likely  
383 to decrease in the 2050s and is expected to shift northwards. Differences in loss-gain of suitability highlight  
384 which agro-ecological zones could be more vulnerable to climate change (Fig 7). According to our  
385 predictions, lowland areas will be the most affected (due to inadequate rainfall), with the central and  
386 northern highlands even improving capacity to sustain macadamia production in areas where this is not  
387 possible due to environmental constraints. Other authors have predicted similar shifts in the suitability of  
388 macadamia-producing areas caused by the impacts of climate change. Barrueto *et al.* reported an upward  
389 shift in suitable areas for macadamia production in Nepal due to the negative impacts of climate warming  
390 [13]. Platts *et al.* found that in the United Kingdom, species will shift their distributions polewards and to  
391 higher elevations in response to climate change [69]. Being associated with a particular set of environmental  
392 conditions, it is feared that Malawi may lose some of its suitable areas for macadamia production due to  
393 climate change. Consequently, our findings highlight the negative impacts climate change may have on  
394 macadamia suitability in Malawi.

395 From our results, we observe that the extent of suitable areas for macadamia production in Malawi will  
396 decrease over the next 40–50 years. Our analysis reveals that the currently suitable areas in the southern  
397 region will be the most affected, while areas located along the country's central and northern parts,  
398 dominated by highlands, will become more favorable for the crop. The greatest victims will be areas  
399 currently experiencing a hotter and drier environment (Fig 8). Consequently, these results show the  
400 sensitivity of macadamia to variations in ecological conditions. Our findings confirm and, more  
401 importantly, extend the work by [38], who found an inverse relationship between increases in temperature  
402 (all the four RCPs) with the decline in suitability for macadamia production in Nepal. Other published  
403 studies show that higher temperatures ( $\geq 30$  °C) and water stress reduce macadamia vegetative growth and  
404 reproduction [70], restrict the build-up of oil [71], reduce raceme and nut retention [72], and reduce

405 macadamia yields [73]. Therefore, in areas where there are no predicted macadamia suitability changes,  
406 farmers could continue planting their macadamia trees. However, both research and field-based evidence  
407 from discussions with farmers show that climate-related changes are already occurring (heatwaves,  
408 droughts, and flooding) and affecting macadamia production in Malawi. For example, Kelvin Masinga, a  
409 macadamia farmer from Neno district, reported that:

410 *"Recently, I have started seeing the effects of climate change on my macadamia trees, the coats of*  
411 *the nuts have changed their color from dark green to brown, and due to very hot weather, there is*  
412 *increased failing and dying of flowers."*

413 Farmers are, therefore, encouraged to start implementing adaptation measures such as the use of improved  
414 macadamia varieties, agroforestry, intercropping, water conservation, and irrigation for long-term and  
415 sustainable macadamia production. Nonetheless, these suitability changes are predicted to occur over the  
416 next 40–50 years, so these will mostly impact the next generation of macadamia farmers rather than the  
417 current generation. Therefore, there is still time for adaptation. Failure to adapt in time to the risk of  
418 decreasing yields and incomes may lead to the migration of rural populations to the main cities of Blantyre,  
419 Lilongwe, and Mzuzu.

420 Altitude provides an excellent climatic change comparison for health, growth, and yield of crops [74], [75].  
421 As a result, individual plants grow very well in high altitudes, whereas others can only grow in middle or  
422 lower-altitude areas [76]. Comparing the current and future suitable areas for macadamia production in  
423 Malawi reveals an upslope shift in suitability. Our ensemble model showed that low-lying areas at altitudes  
424 ranging from 500–1000 m.a.s.l. will have a decline in macadamia suitability because of the projected general  
425 temperature increases and more dryer conditions. This is primarily true to Malawi's southern districts,  
426 mainly those along the lake and shire valley (Blantyre, Mwanza, Neno, Mulanje, Chikwawa, Thyolo, and  
427 Zomba). This is in line with the predicted losses in land suitable for tea production in the same region  
428 (Mulanje and Thyolo) due to projected increases in warming and droughts [21]. Similarly, in their global  
429 study of coffee suitability, [76] reported that climate change might lead to large losses of areas suitable for

430 the coffee across the globe, mostly in low altitudes below 1000 m.a.sl. However, we established that some  
431 higher elevated areas ( $\geq 1600$  m.a.s.l.), such as some parts of Chitipa, Nkhatabay, Ntchisi, and Rumphi, will  
432 lose suitability due to predicted cold temperatures ( $\leq 4$  °C) and frequent and intense rainfall ( $\geq 1750$  mm).  
433 This reduced suitability is attributed to the high levels of cloud cover experienced in these areas, which  
434 results in lower light intensity reaching the leaves of the trees, thus affecting the total net photosynthesis for  
435 tree growth and oil accumulation. Our findings coincide with [77], who found that suitable areas for  
436 macadamia production decreased after an increase in altitude of over  $\geq 1400$  m.a.s.l in Thailand. Despite  
437 large areas losing suitability, our findings show that some areas will gain suitability for growing macadamia.  
438 This will generally depend on the landscape topography and will occur in the mid-altitude areas as suitability  
439 moves upslope to compensate for increased temperature. Nevertheless, this only applies to minimal areas  
440 within Malawi and cannot compensate for the decrease in suitability.

#### 441 **4.1. Applicability and potential limitations of this study.**

442 Species distribution modelling in space and time is founded on assumptions intrinsic in the models, some  
443 of which cannot be tested [46], [78]. Although this study's findings can be considered robust, several issues  
444 should be considered in the interpretation and application of the results. Though we identified areas as  
445 suitable for macadamia production based on environmental factors, however on the ground, this may not  
446 directly translate to the size of the arable land. Other physical and socio-economic (including the gender  
447 and age of the smallholder farmers, availability of agricultural advisory services, and market availability)  
448 factors that determine suitability are difficult to capture in this type of modelling and should be considered  
449 in applying model results. Due to these challenges, the authenticity of models in making predictions is  
450 questioned [76–77], but modeling remains an important tool for future planning purposes [60], [78], [79].  
451 Therefore, the need for a thorough evaluation of adaptation approaches suggested for smallholder  
452 macadamia farmers, as these may be different from those utilized by commercial growers.

453 It is known that SDM development, particularly for areas with varying topographical terrains such as that  
454 of Malawi, is challenging due to the complexity of the local and regional climate gradients [82]. Hence

455 careful interpretation is required when utilizing our results for the local effects of the future predictions on  
456 macadamia production in Malawi. For agricultural land use planning, our results must be interpreted with  
457 the knowledge of soil nutrition and social-economic factors. In addition, not all macadamia cultivars may  
458 be similarly affected by climate change. We recommend that further studies need to be conducted to evaluate  
459 the effect of climate change on the trait combination of the various cultivars available in Malawi. This will  
460 ensure that the right cultivar is grown in the right place to maximize yields.

461 The temperature and precipitation data utilized in our analysis are based on the IPCC Special Report on  
462 Emission Scenarios [83] using CMIP5 model ensembles (RCPs). We used both emission scenarios and  
463 model ensembles from the IPCC Fifth Assessment Report (AR5) for our modeling analysis. However, our  
464 analysis did not consider Malawi's economic conditions provided by the Shared Socioeconomic Pathways  
465 (SPPs). The SPPs provides five distinct narratives (where each SPPs aligns with one or two of the RCPs)  
466 about the future of the world, exploring a wide range of plausible trajectories of population growth,  
467 urbanization, economic growth, technological and trade development, and implementation of environmental  
468 policies [58], [84]. Therefore a combination of RCPs and SSPs in a model provides more distinct future  
469 scenarios that are more feasible due to the integration of radioactive forcing ( $W/m^2$ ) and socio-economic  
470 development influences [83], [86]. Despite the lack of incorporating the SSPs in our modelling approach,  
471 our results' interpretation and recommendations combine the ensemble model's prediction results, our  
472 general knowledge of Malawi's climate and agricultural systems, and expert opinions. Therefore, our study  
473 is considered thorough in providing accurate and meaningful results for macadamia's current and future  
474 suitability.

475 Model building is another limiting factor when considering to assess the distribution of species in an area  
476 due to different forms of uncertainties that may be incurred during this process [79]. We utilized the  
477 automated model calibration method for our analysis as it is embedded with novel modelling frameworks  
478 [79]. Using the automated approach, we eliminated sources of uncertainty such as collinearity and model  
479 overfitting, which are associated with other methods of model building, such as that of the "priori selection

480 of a set of explanatory variables" model building method [79], [87]. Consequently, our results have a high  
481 accuracy level (AUC, 0.88) because we reduced uncertainty caused by highly correlated environmental  
482 predictors by applying the variance inflation factors during variable selection. In addition, unlike  
483 smallholder farmers, agricultural planners are required to take a long-term view of the situation and rely on  
484 predictions from models to support their decisions. The cost of being wrong can be very high. As such, the  
485 idea of using ensemble models for suitability studies is vital and appealing [48], [55], [88], [82]. This is  
486 because ensemble models combine predictions from different algorithms of SDM and the results are closest  
487 to the truth in all circumstances [17], [90], [91].

## 488 **5. Conclusions.**

489 In responding to climate change impacts, the United Nations Framework Convention on Climate Change  
490 (UNFCCC) advocates for Least Developed Countries' response to be adaptation rather than mitigation.  
491 Therefore, building a sustainable and climate-resilient macadamia sector in Malawi could provide a much-  
492 needed economic boost. Our ensemble model successfully delineated the current climatically suitable areas  
493 for macadamia production and the potential expansion of suitable areas by the 2050s. However, most of the  
494 suitable areas identified for macadamia production exist in agricultural land currently utilized for the  
495 production of other crops. Therefore, we suggest promoting macadamia agroforestry and intercropping with  
496 other crops such as maize, groundnuts, soybeans, and sunflower in the agricultural fields as an adaptation  
497 strategy to climate change farm intensification due to limited land, particularly among smallholders.  
498 Additionally, large mono-cropped orchards are generally at high risks for pests and disease. However, these  
499 risks would be kept minimal if macadamia is planted in small-scale agroforestry plots, which is what we  
500 recommend.

501 Future projections have indicated northward shifts in areas suitable for macadamia production in Malawi.  
502 Extensive areas currently suitable for the crop are projected to be lost in the future due to increased warming  
503 and extreme precipitation patterns, especially droughts. Nevertheless, some new areas will become suitable  
504 for the crop. Therefore, macadamia communities need to develop locally specific adaptation measures for



505 the macadamia sector's continued profitability under adverse climatic conditions for increased resilience.  
506 Among the priority measures to reduce Malawi's macadamia sector's vulnerability to climate change is  
507 breeding programs for greater drought resistance. To be effective, the varieties and traits need to be selected  
508 with the inclusion of smallholder farmer preferences. Irrigation might be an option in some places; however,  
509 considering its cost is unlikely to be adopted by a large number of smallholder farmers in Malawi.

510 We conclude that further research should examine other factors that influence macadamia production within  
511 Malawi's agro-ecological zones to improve our ensemble species distribution model's applicability. For  
512 example, vital research on market accessibility, availability of agricultural advisory services, workload, and  
513 gender perspectives among macadamia smallholders should be conducted for informed decision-making.  
514 On a national level, we recommend research into the influence of expected climate changes on microclimatic  
515 and soil conditions such as soil texture, soil pH, soil nutrition, wind, and humidity. We also recommend  
516 investing in studies that examine and employ better quality techniques of planning, selecting, and cultivating  
517 the best crop varieties for Malawi's climate. Finally, at a strategic level, we strongly recommend an  
518 investigation into the impact of climate change on the current land use policy and its implications for  
519 agriculture in Malawi, especially for macadamia and other high-value perennial crops that require  
520 significant initial investments.

## 521 **Acknowledgements.**

522 The authors are grateful to the Open University and the UK Research and Innovation through Global  
523 Challenges Research Fund (GCRF) project for funding and academic guidance. Thanks go to Dr. Phillip  
524 Holden, The Open University, UK, Prof. Rick Brandenburg, North Carolina State University, USA, Dr.  
525 Abel Chemura, Potsdam Institute for Climate Impact Research (PIK), German, Dr. Michael G. Chipeta,  
526 Oxford University, Dr. Edith B. Milanzi, MRC Clinical Trials, University College London, the Neno  
527 Macadamia Trust, UK and Highlands Macadamia Cooperative Union Limited (HIMACUL) smallholder  
528 farmers, Malawi. We further express our gratitude to Mr. Ken Mkangala and Nicholas Evans for their

529 constructive comments and feedback on the state of macadamia production in Malawi. However, mistakes  
530 and omissions are our responsibility.

### 531 **Competing Interests.**

532 The authors declare no conflict of interests.

### 533 **Author contributions.**

534 **Conceptualization:** Emmanuel Junior Zuza, Yoseph N. Araya, Kadmiel Maseyk, Shonil Bhagwat, Andrew  
535 Emmott.

536 **Data curation :** Emmanuel Junior Zuza, Kauê de Sousa.

537 **Formal analysis :** Emmanuel Junior Zuza, Kauê de Sousa.

538 **Methodology :** Emmanuel Junior Zuza, Kauê de Sousa, Kadmiel Maseyk, Yoseph Araya, Shonil Bhagwat.

539 **Software :** Emmanuel Junior Zuza, Kauê de Sousa.

540 **Supervision :** Yoseph N. Araya, Kadmiel Maseyk, Shonil Bhagwat, Andrew Emmott.

541 **Validation :** Emmanuel Junior Zuza, Yoseph N. Araya, Kauê de Sousa, Kadmiel Maseyk, Shonil Bhagwat,  
542 Andrew Emmott.

543 **Visualisation :** Emmanuel Junior Zuza, Kauê de Sousa, Yoseph N. Araya, Shonil Bhagwat.

544 **Writing – original draft :** Emmanuel Junior Zuza, Yoseph Araya, Kadmiel Maseyk, Shonil Bhagwat.

545 **Writing – Review and Editing :** Emmanuel Junior Zuza, Kauê de Sousa, Kadmiel Maseyk, Shonil  
546 Bhagwat, Yoseph N. Araya, Andrew Emmott.

### 547 **References**

548 [1] Xu C, Kohler TA, Lenton TM, Svenning JC, Scheffer M. Future of the human climate niche. *Proc.*  
549 *Natl. Acad. Sci. USA.* 2020; 117:21. <https://doi.org/10.1073/pnas.1910114117>.

- 550 [2] Sultan B, Defrance D, Iizumi T. Evidence of crop production losses in West Africa due to historical  
551 global warming in two crop models. *Sci. Rep.* 2019. pp. 1–15. [https://doi.org/10.1038/s41598-019-](https://doi.org/10.1038/s41598-019-49167-0)  
552 49167-0.
- 553 [3] Woetzel J, Pinner D, Samandari H, Engel H, McCullough R, Melzer T, Boettiger S. How will  
554 African farmers adjust to changing patterns of precipitation. *McKinsey Global Institute*, Chicago,  
555 USA. 2020.
- 556 [4] Niang I, Rupper OC, Abdrado MA, Essel A, Lennard C, Padgham J, Urquhart P. Africa. In: Climate  
557 Change 2014: Impacts, Adaptation, and Vulnerability. Part B: Regional Aspects of Working Group  
558 II to the Fifth Assessment Report of the Intergovernmental Panel on Climate Change [Barros VR,  
559 Field CB, Dokken DJ, Mastrandrea MD, Mach KJ, Bilir TE, Chatterjee M, Ebi KL, Estrada YO,  
560 Genova RC, Girma B, Kissel ES, Levy AN, MacCranken S, Mastrandrea PR, White LL (eds)].  
561 *Cambridge University Press, Cambridge*, The United Kingdom and New York, NY, USA. 2014. pp.  
562 1199–1266. <https://doi.org/10.1017/CBO9781107415386.002>.
- 563 [5] Rivrud IM, Meisingset EL, Loe LE, Mysterud A. Future suitability of habitat in a migratory ungulate  
564 under climate change. *Proceedings. Biol. Sci.* 2019; 286:20190442.  
565 <https://doi.org/10.1098/rspb.2019.0442>.
- 566 [6] Dougill AJ, Mkwambisi D, Vincent K, Archer E, Bhave A, Malinga RH, Mataya DC. How can we  
567 improve the use of information for a climate-resilient Malawi? 2019. Available online:  
568 [www.futureclimateafrica.org](http://www.futureclimateafrica.org) (accessed on 7 September 2019).
- 569 [7] Mataya DC, Vincent K, Dougill AJ. How can we effectively build capacity to adapt to climate  
570 change? Insights from Malawi. *Clim. Dev.* 2019. <https://doi.org/10.1080/17565529.2019.1694480>.
- 571 [8] Warnatzsch EA, Reay DS. Assessing climate change projections and impacts on Central Malawi's  
572 maize yield: The risk of maladaptation. *Sci. Total Environ.* 2020: 711. 134845,  
573 <https://doi.org/10.1016/j.scitotenv.2019.134845>.
- 574 [9] Mittal D, Vincent N, Conway K, van Garderen D, Pardoe EA, Todd J, Washington M, Siderius R,  
575 Mkwambisi D. Future climate projections for Malawi. 2017. Available online:  
576 [www.futureclimateafrica.org](http://www.futureclimateafrica.org) (accessed on 10 January 2021).
- 577 [10] Warnatzsch EA, Reay DS. Temperature and precipitation change in Malawi: Evaluation of  
578 CORDEX-Africa climate simulations for climate change impact assessments and adaptation  
579 planning. *Sci. Total Environ.* 2019; 654: 378–392. <https://doi.org/10.1016/j.scitotenv.2018.11.098>.
- 580 [11] The World Bank, "Malawi Country Environmental Analysis. The World Bank, Washington DC,

- 581 USA. 2019. Available:  
582 <https://dx.doi.org/10.1016/j.cirp.2016.06.001><http://dx.doi.org/10.1016/j.powtec.2016.12.055>  
583 %0A<https://doi.org/10.1016/j.ijfatigue.2019.02.006>[https://doi.org/10.1016/j.matlet.2019.04.0](https://doi.org/10.1016/j.matlet.2019.04.024)  
584 24%0A<https://doi.org/10.1016/j.matlet.2019.127252><http://dx.doi.o>.
- 585 [12] Benson T, Mabiso A, Nankhuni F. Detailed crop suitability maps and an agricultural zonation  
586 scheme for Malawi. Michigan State University, Michigan, USA. 2016. Available:  
587 <http://dec.usaid.gov/>.
- 588 [13] Barrueto AK, Niraula R, Merz J, Pokharel B, Hammer T. Climatic suitability predictions for the  
589 cultivation of macadamia and walnuts in existing land-use zones and forest management regimes  
590 under climate change scenarios: addressing food security in the mid-hills of Nepal. *For. Trees*  
591 *Livelihoods*. 2018; 27: 86–102. <https://doi.org/10.1080/14728028.2018.1438930>.
- 592 [14] Chibwana GA, Mapemba LD, Masikat P, Homann-Kee ST, Crespo O, Bandason E. Modeling  
593 potential impacts of future climate change in Mzimba district, Malawi, 2040-2070. An integrated  
594 biophysical and economic Modeling approach. *International Food Policy Research Institute*,  
595 Washington DC, USA. 2014. pp 17.
- 596 [15] Li G, Messina JP, Peter BG, Snapp SS. Mapping land suitability for agriculture in Malawi. *L.*  
597 *Degrad. Dev.* 2017; 28: 2001–2016. <https://doi.org/10.1002/ldr.2723>.
- 598 [16] Wang C, Shi X, Liu J, Zhao J, Bo X, Chen F, Chu Q. Interdecadal variation of potato climate  
599 suitability in China. *Agric. Ecosyst. Environ.* 2021; 28: 2001–2016.  
600 <https://doi.org/10.1002/ldr.2723>.
- 601 [17] Taghizadeh-Mehrjardi R, Nabiollahi K, Rasoli L, Kerry R, Scholten T. Land suitability assessment  
602 and agricultural production sustainability using machine learning models. *Agronomy*. 2020; 10: 1–  
603 20. <https://doi.org/10.3390/agronomy10040573>.
- 604 [18] Bock M, Gasser PY, Pettapiece WW, Brierley AJ, Bootsma A, Schut P, Neilsen D, Smith S. The  
605 land suitability rating system is a spatial planning tool to assess crop suitability in Canada. *Front.*  
606 *Environ. Sci.* 2018; 6: 1–16 <https://doi.org/10.3389/fenvs.2018.00077>.
- 607 [19] Skevas T, Swinton MS, Tanner S, Sanford G, Thelen K.D. Investment risk in bioenergy crops.  
608 *Bioenergy*. 2016; 8: 1162–1177. <https://doi.org/10.1111/gcbb.12320>.
- 609 [20] Zuza EJ, Bhagwat S, Emmott A, Rawes W, Maseyk K, Araya YN. Review of Macadamia  
610 Production in Malawi: Focusing on What, Where, How Much Is Produced and Major Constraints.  
611 *Agriculture*. 2021. 11; 2:152. <https://doi.org/10.3390/agriculture11020152>.

- 612 [21] International Center for Tropical Agriculture (CIAT). Identification of suitable tea Growing areas  
613 in Malawi under climate change scenarios. 2017. [Online]. Available: [https://utz.org/wp-](https://utz.org/wp-content/uploads/2017/12/CIAT-report-climate-impact-tea-production-Malawi.pdf)  
614 [content/uploads/2017/12/CIAT-report-climate-impact-tea-production-Malawi.pdf](https://utz.org/wp-content/uploads/2017/12/CIAT-report-climate-impact-tea-production-Malawi.pdf).
- 615 [22] van Vagt D. Participatory approaches to diversification and intensification of crop production on  
616 smallholder farms in Malawi. *The Wageningen University*, Wageningen, Netherlands. Ph.D. Theses.  
617 2018. [https://doi.org/https://doi.org/10.18174/456315](https://doi.org/10.18174/456315).
- 618 [23] Bezner Kerr R, Nyantakyi-Frimpong H, Dakishoni L, Lupafya E, Shumba L, Luginaah I, Snapp SS.  
619 Knowledge politics in participatory climate change adaptation research on agroecology in Malawi.  
620 *Ren. Agr and Fd Syst.* 2018; 33: 238–251. <https://doi.org/10.1017/S1742170518000017>.
- 621 [24] The Government of Malawi. National Agricultural Investment Plan (NAIP), 2011-2014. *The*  
622 *Government of Malawi*, Lilongwe, Malawi. 2018. pp 40.
- 623 [25] Gondwe S, Kasiya S, Maulidi F, Timanyechi G. Assessment of youth employment initiatives in  
624 Malawi : Implementation realities and policy perspectives. *FARA Research Report.* 2020. 5:6. pp.  
625 32.
- 626 [26] Sutcliffe CA. Adoption of improved maize cultivars for climate vulnerability reduction in Malawi.  
627 *The University of Leeds*, Leeds, The United Kingdom. Ph.D. Theses. 2014.
- 628 [27] Chingala G, Mapiye C, Raffrenato E, Hoffman L, Dzama K. Determinants of smallholder farmers'  
629 perceptions of the impact of climate change on beef production in Malawi. *Clim. Change.* 2017; 142:  
630 129–141. <https://doi.org/10.1007/s10584-017-1924-1>.
- 631 [28] The Malawi Vulnerability Assessment Committee. Food security forecast for the 2018/19  
632 Consumption Year. 2018. [Online]. Available: [https://reliefweb.int/report/malawi/malawi-](https://reliefweb.int/report/malawi/malawi-vulnerability-assessment-committee-mvac-bulletin-no-1518-volume-1-food-security)  
633 [vulnerability-assessment-committee-mvac-bulletin-no-1518-volume-1-food-security](https://reliefweb.int/report/malawi/malawi-vulnerability-assessment-committee-mvac-bulletin-no-1518-volume-1-food-security).
- 634 [29] Goodman KD, Dahir PS, Singh AL. The other way Covid will kill: Hunger. *The New York Times*,  
635 New York, NY, USA, Sep. 11, 2020.
- 636 [30] Snapp S, Jayne TS, Mhango W, Benson T, Ricker-Gilbert J. Maize yield response to nitrogen in  
637 Malawi's smallholder production systems. *Natl. Symp.* 2014. pp. 13. [Online].  
638 Available:<http://ebrary.ifpri.org/utils/getfile/collection/p15738coll2/id/128436/filename/128647.pdf>  
639 [f%0Ahttps://ageconsearch.umn.edu/record/188570](https://ageconsearch.umn.edu/record/188570).
- 640 [31] Coulibaly JY, Mbow C, Sileshi GW, Beedy T, Kundhlande G, Musau J. Mapping vulnerability to  
641 climate change in Malawi: Spatial and social differentiation in the Shire River Basin. *Am. J. Clim.*  
642 *Chang.* 2015; 4: 282–294. <https://doi.org/10.4236/ajcc.2015.43023>.

- 643 [32] Alam M, Hardner C, Nock C, O'Connor K, Topp B. Historical and molecular evidence of the genetic  
644 identity of macadamia cultivars HAES 741 and HAES 660. *HortScience*. 2019; 54: 616–620.  
645 <https://doi.org/10.21273/HORTSCI13318-18>.
- 646 [33] Parshotam A. Cultivating smallholder inclusion in southern Africa's Macadamia Nut Value Chains.  
647 *South African Institute of International Affairs*, Pretoria, South Africa. 2018.
- 648 [34] Toit JP, Nankhuni FJ, Kanyamuka JS. Can Malawi increase its share of the global macadamia  
649 market? Opportunities and threats to the expansion of Malawi's macadamia Industry. *Michigan State*  
650 *University*, Michigan, USA. 2017. pp. 20.
- 651 [35] Moncur T, Stephenson MW, Trochoulia RA. Floral development of *Macadamia integrifolia* Maiden  
652 and Betche under Australian conditions. *Sci. Hortic*. 1985; 27: 87–96.
- 653 [36] Barrueto AK, Merz J, Hodel E, Eckert S. The suitability of Macadamia and Juglans for cultivation  
654 in Nepal: an assessment based on spatial probability modelling using climate scenarios and in situ  
655 data. *Reg. Environ. Chang*. 2018; 18: 859–871. <https://doi.org/10.1007/s10113-017-1225-2>.
- 656 [37] Nagao MA, Ho-a EB, Yoshimoto JM. Relationship between vegetative flushing and flowering of  
657 macadamia. *HortScience*. 1994; 27: 669–669. <https://doi.org/10.21273/hortsci.27.6.669g>.
- 658 [38] Evans N. Suitability Mapping of the Malawi macadamia industry. *Consultation Report*. 2008.
- 659 [39] Britz A. Studies on Macadamia nut quality. The University of Stellenbosch, Stellenbosch, South  
660 Africa, MSc Theses. 2015.
- 661 [40] Hijmans RJ, Cameron SE, Parra JL, Jones PG, Jarvis A.. Very high resolution interpolated climate  
662 surfaces for global land areas. *Int. J. Climatol*. 2005; 25: 1965–1978.  
663 <https://doi.org/10.1002/joc.1276>.
- 664 [41] IPCC. Climate Change 2007: The Physical Science Basis. Contribution of Working Group I to the  
665 Fourth Assessment Report of the Intergovernmental Panel on Climate Change [Solomon, S., D. Qin,  
666 M. Manning, Z. Chen, M. Marquis, K.B. Averyt, M. Tignor, and H.L. Miller. *Cambridge University*  
667 *Press*, Cambridge, The United Kingdom and New York, NY, USA. 2007. pp 996.
- 668 [42] van Vuuren DP, Edmonds J, Kainuma M, Riahi K, Thomson A, Hibbard K, Hurtt GC, Kram T,  
669 Krey V, Lamarque JF, Masui T, Meinshausen M, Nakicenovic N, Smith SJ, Rose SK. The  
670 representative concentration pathways: An overview. *Clim. Change*. 2011; 109: 5–31.  
671 <https://doi.org/10.1007/s10584-011-0148-z>.
- 672 [43] Lipper L, Thornton P, Campbell BM, Baedeker T, Braimoh A, Bwalya M, Caron P, Cattaneo A,

- 673 Garrity D, Henry K, Hottle R, Jackson L, Jarvis A, Kossam F, Mann W, McCarthy N, Meybeck A,  
674 Neufeldt H, Remington T, Torquebiau EF. Climate-smart agriculture for food security. *Nat. Clim.*  
675 *Chang.* 2014; 4: 1068–1072. <https://doi.org/10.1038/nclimate2437>.
- 676 [44] The Government of Malawi. Annual Economic Report Annual. The Government of Malawi,  
677 Lilongwe, Malawi. 2020. pp 301.
- 678 [45] Mutegi J, Kabambe V, Zingore S, Harawa R, Wairegi L. The status of fertilizer recommendation in  
679 Malawi: Gaps, challenges, and opportunities. Soil Health Consortium of Malawi. 2015. pp 56.
- 680 [46] Chemura A. Modelling spatial variability of coffee (*Coffea arabica* L) crop condition with  
681 multispectral remote sensing data. The University of KwaZulu-Natal, KwaZulu, South Africa, Ph.D.  
682 Theses. 2017.
- 683 [47] Kindt R. Ensemble species distribution modelling with transformed suitability values. *Environ.*  
684 *Model. Softw.* 2018; 100: 136–145. <https://doi.org/10.1016/j.envsoft.2017.11.009>.
- 685 [48] de Sousa K, van Zonneveld M, Holmgren M, Kindt R, Ordoñez JC. The future of coffee and cocoa  
686 agroforestry in a warmer Mesoamerica. *Sci. Rep.* 2019; 9: 1–9. [https://doi.org/10.1038/s41598-019-](https://doi.org/10.1038/s41598-019-45491-7)  
687 [45491-7](https://doi.org/10.1038/s41598-019-45491-7).
- 688 [49] Behroozian M, Ejtehadi H, Townsend Peterson A, Memariani F, Mesdaghi M. Climate change  
689 influences on the potential distribution of *Dianthus polylepis* Bien. ex Boiss. (*Caryophyllaceae*), an  
690 endemic species in the Irano-Turanian region. *PLoS One.* 2020; 15:8.  
691 <https://doi.org/10.1371/journal.pone.0237527>.
- 692 [50] Ranjitkar S, Sujakhu NM, Merz J, Kindt R, Xu J, Matin MA, Ali M, Zomer RJ. Suitability analysis  
693 and projected climate change impact on banana and coffee production zones in Nepal. *PLoS One.*  
694 2016; 11. <https://doi.org/10.1371/journal.pone.0163916>.
- 695 [51] Chemura A, Kutwayo D, Chidoko P, Mahoya C. Bioclimatic modelling of current and projected  
696 climatic suitability of coffee (*Coffea arabica*) production in Zimbabwe. *Reg. Environ. Chang.* 2016;  
697 16: 473–485. <https://doi.org/10.1007/s10113-015-0762-9>.
- 698 [52] de Sousa K, Solberg SØ. Conservation gaps in traditional vegetables native to Europe and  
699 Fennoscandia. *Agriculture.* 2020. 10: 8. 340. <https://doi.org/10.3390/agriculture10080340>.
- 700 [53] Brotons L, Thuiller W, Araújo MB, Hirzel AH. Presence-absence versus presence-only modelling  
701 methods for predicting bird habitat suitability," *Ecography (Cop.)*. 2004; 27: 437–448.  
702 <https://doi.org/10.1111/j.0906-7590.2004.03764.x>.

- 703 [54] Thuiller W, Lavergne S, Roquet C, Boulangeat I, Lafourcade B, Araujo M. B. Consequences of  
704 climate change on the tree of life in Europe. *Nature*. 2011; 470: 531–534.  
705 <https://doi.org/10.1038/nature09705>.
- 706 [55] Rabara RC, Sotto RC, Salas EAL. Species distribution modeling and phenotypic diversity reveals a  
707 collection gap in the *Musa balbisiana* germplasm conservation in the Philippines. *Asian J. Agric.*  
708 2020; 4 (2): 60–71. <https://doi.org/10.13057/asianjagric/g040203>.
- 709 [56] Jiménez-Valverde A. Threshold-dependence as a desirable attribute for discrimination assessment:  
710 implications for the evaluation of species distribution models. *Biodivers Conserv*. 2014; 23: 369–  
711 385. <https://doi.org/10.1007/s10531-013-0606-1>.
- 712 [57] de Sousa K, van Zonneveld M, Imbach P, Casanoves F, Kindt R, Ordoñez JC. Suitability of key  
713 Central American agroforestry species under future climates: An atlas. *ICRAF Occasional Paper* no.  
714 26. Turrialba, Costa Rica. 2017.
- 715 [58] Chemura A. Why coffee will be bitter under climate change: Indications from Ethiopia. Unpublished.
- 716 [59] Gama M, Crespo D, Dolbeth M, Anastácio P. Predicting global habitat suitability for *Corbicula*  
717 *fluminea* using species distribution models: The importance of different environmental datasets.  
718 *Ecol. Modell*. 2016; 319: 163–169. <https://doi.org/10.1016/j.ecolmodel.2015.06.001>.
- 719 [60] de Sousa K. Agrobiodiversity and climate adaptation: insights for risk management in small-scale  
720 farming. *Inland Norway University of Applied Sciences*. 2020: Ph.D. Theses.
- 721 [61] Jorcin P, Barthe L, Berroneau M, Dore F, Geniez P, Grillet P, Kabouch B, Movia A, Naimi B, Pottier  
722 G, Thirion JM, Cheylan M. Modelling the distribution of the Ocellated Lizard in France:  
723 Implications for conservation," *Amphib. Reptil. Conserv*. 2019; 13: 276–298, 2019.
- 724 [62] Liu C, White M, Newell G. Selecting thresholds for the prediction of species occurrence with  
725 presence-only data. *J. Biogeogr*. 2013; 40:778–789. <https://doi.org/10.1111/jbi.12058>.
- 726 [63] Domisch S, Araújo MB, Bonada N, Pauls SU, Jähnig SC, Haase P. Modelling distribution in  
727 European stream macroinvertebrates under future climates. *Glob. Chang. Biol*. 2013; 19: 752–762.  
728 <https://doi.org/10.1111/gcb.12107>.
- 729 [64] Mastrandrea MD, Field CB., Stocker TF, Edenhofer O, Ebi KL, Frame DJ, Held H, Kriegler E,  
730 Mach KJ, Matschoss PR, Plattner GK, Yohe GW, Zwiers FW. Guidance note for lead authors of  
731 the IPCC Fifth Assessment Report on Consistent Treatment of Uncertainties. 2010. [Online].  
732 Available: <http://www.ipcc.ch>.



- 733 [65] Al-Qaddi N, Vessella F, Stephan J, Al-Eisawi D, Schirone B. Current and future suitability areas of  
734 kermes oak (*Quercus coccifera* L.) in the Levant under climate change. *Reg. Environ. Chang.* 2017;  
735 17: 143–156. <https://doi.org/10.1007/s10113-016-0987-2>.
- 736 [66] Wasilwa LA, Watani GW, Ondabu N, Nyaga A, Kagiri B, Kiiru S. Performance of macadamia  
737 varieties in three agro-ecological zones in Kenya. *HortScience.* 2019; 35: 477B – 477.  
738 <https://doi.org/10.21273/hortsci.35.3.477>.
- 739 [67] Stevens T, Madani K. Future climate impacts on maize farming and food security in Malawi. *Sci.*  
740 *Rep.* 2016; 6. <https://doi.org/10.1038/srep36241>.
- 741 [68] Mittal D, Vincent N, Conway K, van Garderen D, Pardoe E.A, Todd J, Washington M, Siderius R,  
742 Mkwambisi D. Future climate projections for Malawi. Annex. Available online:  
743 [www.futureclimateafrica.org](http://www.futureclimateafrica.org) (accessed on 10 January 2021).
- 744 [69] Platts PJ, Mason SC, Palmer G, Hill SK, Oliver TH, Powney GD, Fox R, Thomas CD. Habitat  
745 availability explains variation in climate-driven range shifts across multiple taxonomic groups. *Sci.*  
746 *Rep.* 2019; 9: 1–10. <https://doi.org/10.1038/s41598-019-51582-2>.
- 747 [70] Trochoulis T, Lahav E. The effect of temperature on growth and dry-matter production of  
748 macadamia," *Sci. Hortic.* 1983; 19 (1–2): 167–176. [https://doi.org/10.1016/0304-4238\(83\)90058-4](https://doi.org/10.1016/0304-4238(83)90058-4).
- 749 [71] Stephenson RA, Gallagher EC. Effects of temperature during latter stages of nut development on  
750 growth and quality of macadamia nuts. *Sci. Hortic.* 1986; 30: 219–225. [https://doi.org/10.1016/0304-4238\(86\)90100-7](https://doi.org/10.1016/0304-4238(86)90100-7).
- 751
- 752 [72] Perdoná MJ, Soratto RP. Higher yield and economic benefits are achieved in the macadamia crop  
753 by irrigation and intercropping with coffee. *Sci. Hortic.* 2015; 185: 59–67.  
754 <https://doi.org/10.1016/j.scienta.2015.01.007>.
- 755 [73] Nagao MA. Farm and forestry production and marketing profile for macadamia nut (*Macadamia*  
756 *integrifolia* and *M. tetraphylla*) Specialty Crops for Pacific Island Agroforestry  
757 (<http://agroforestry.net/scps>) 2011. [Online]. Available: <http://agroforestry.net/scps>.
- 758 [74] Imbach P, Fung E, Hannah L, Navarro-Racines CE, Roubik DW, Ricketts TH, Harvey CA, Donatti  
759 CI, Läderach P, Locatelli B, Roehrdanz PR. Coupling of pollination services and coffee suitability  
760 under climate change. *Proc. Natl. Acad. Sci.* 2017; 114: 10438–10442.  
761 <https://doi.org/10.1073/pnas.1617940114>.
- 762 [75] Ovalle-Rivera O, Läderach P, Bunn C, Obersteiner M, Schroth G. Projected shifts in *Coffea arabica*  
763 suitability among major global producing regions due to climate change. *PLoS One.* 2015; 10 (4).

- 764 <https://doi.org/10.1371/journal.pone.0124155>.
- 765 [76] Bunn C, Läderach P, Ovalle Rivera O, Kirschke D. A bitter cup: climate change profile of global  
766 production of *Arabica* and *Robusta* coffee. *Clim. Change.* 2015; 129: 89–101.  
767 <https://doi.org/10.1007/s10584-014-1306-x>.
- 768 [77] Pichakum A, Supaibulwatana K, Chintakovid W, Chanseetis C. Role of temperature and altitude on  
769 flowering performances of macadamia nut. *Acta Hortic.* 2015; 1024: 127–132,  
770 <https://doi.org/10.17660/ActaHortic.2014.1024.13>.
- 771 [78] Kutuywayo D, Chemura A, Kusena W, Chidoko P, Mahoya C. The impact of climate change on the  
772 potential distribution of agricultural pests: The case of the coffee white stem borer (*Monochamus*  
773 *leuconotus* P.) in Zimbabwe. *PLoS One.* 2013; 8. <https://doi.org/10.1371/journal.pone.0073432>.
- 774 [79] Heikkinen RK, Luoto M, Araújo MB, Virkkala R, Thuiller W, Sykes MT. Methods and uncertainties  
775 in bioclimatic envelope modelling under climate change. *Prog. Phys. Geogr.* 2006; 30: 751–777.  
776 <https://doi.org/10.1177/0309133306071957>.
- 777 [80] Ranjitkar S, Sujakhu NM, Lu Y, Wang Q, Wang M, He J, Mortimer PE, Xu J, Kindt R, Zomer R.  
778 Climate modelling for agroforestry species selection in Yunnan Province, China. *Environ. Model.*  
779 *Softw.* 2016; 75: 263–272. <https://doi.org/10.1016/j.envsoft.2015.10.027>.
- 780 [81] Pereira HM, Leadley PW, Proenca V, Alkemade R, Scharlemann JPW, Fernandez-Manjarres JF,  
781 Araujo MB, Balvanera P, Biggs R, Cheung WWL, Chini L, Cooper HD, Gilman EL, Guenette S,  
782 Hurtt GC, Huntington HP, Mace GM, Oberdorff T, Revenga C. Scenarios for Global Biodiversity in  
783 the 21st Century: Supporting information. *Science.* 2010; 80: 496–1502, 2010, [Online]. Available:  
784 <http://science.sciencemag.org/content/sci/330/6010/1496.full.pdf%0Ahttp://api.iucnredlist.org/go/p>  
785 <http://api.iucnredlist.org/go/p/anthera-leo>.
- 786 [82] The Intergovernmental Panel on Climate Change. Climate Change 2014 Synthesis Report.  
787 Contribution of Working Groups I, II, and III to the Fifth Assessment Report of the  
788 Intergovernmental Panel on Climate Change [Core Writing Team, RK Pachauri and L.A. Meyer  
789 (eds.)]. 2014. IPCC. Geneva, Switzerland. Pp 151.
- 790 [83] Schandl H, Lu Y, Che N, Newth D, West J, Frank S, Obersteiner M, Rendal A, Hatfield-Dodds S.  
791 Shared socio-economic pathways and their implications for global materials use. *Resour. Conserv.*  
792 *Recycl.* 2020; 160: 104866. <https://doi.org/10.1016/j.resconrec.2020.104866>.
- 793 [84] Molotoks A, Stehfest E, Doelman J, Albanito F, Fitton N, Dawson TP, Smith P. Global projections  
794 of future cropland expansion to 2050 and direct impacts on biodiversity and carbon storage. *Glob.*

- 795 *Chang. Biol.* 2018; 24: 5895–5908. <https://doi.org/10.1111/gcb.14459>.
- 796 [85] van Vuuren DP, Stehfest E, Gernaat DEHJ, van den Berg M, Biji DL, de Boer HS, Daioglou V,  
797 Doelma JC, Edelenbosch OY, Harmsen M, Hof AF, van Sluisveld MAE. Alternative pathways to  
798 the 1.5 °c target reduce the need for negative emission technologies. *Nat. Clim. Chang.* 2018; 8:  
799 391–397. <https://doi.org/10.1038/s41558-018-0119-8>.
- 800 [86] Marmion M, Parviainen M, Luoto M, Heikkinen RK, Thuiller W. Evaluation of consensus methods  
801 in predictive species distribution modelling. *Divers. Distrib.* 2009; 15: 59–69.  
802 <https://doi.org/10.1111/j.1472-4642.2008.00491.x>.
- 803 [87] Araújo MB, New M. Ensemble forecasting of species distributions. *Trends Ecol. Evol.* 2007; 22:  
804 42–47. <https://doi.org/10.1016/j.tree.2006.09.010>.
- 805 [88]. Alexandre J, Bini LM, Rangel TF. Species turnover under climate change. *Ecography.* 2019;  
806 32:897–906. <https://doi.org/10.1111/j.1600-0587.2009.06196.x>
- 807 [89]. Olden DJ, Jackson AD. A comparison of statistical approaches for modelling fish species  
808 distributions. *Freshw Biol.* 2002; 47:1976–1995.
- 809 [90]. Segurado P, Araújo MB. An evaluation of methods for modelling species distributions. *J Biogeogr.*  
810 2004; 31:1555–1568. <https://doi.org/10.1111/j.1365-2699.2004.01076.x>
